# Supplementary material for: The Decline of Physical Activity with Age in School-Aged Children with Cerebral Palsy: A Single-Center Cross-Sectional Observational Study
Source: MDPI journal article supplement (doi:10.3390/jcm12134548), 2023-07-07
Supplement: s1 [file s1]

**Table S1. Modified Naughton Protocol.**

| Stage | min | km/h | %GR  | Stage | min | km/h | %GR  |
|-------|-----|------|------|-------|-----|------|------|
| 1     | 2   | 1.6  | 0    | 6     | 12  | 4.8  | 7.5  |
| 2     | 4   | 2.4  | 0    | 7     | 14  | 4.8  | 10   |
| 3     | 6   | 3.2  | 3.5  | 8     | 16  | 4.8  | 12.5 |
| 4     | 8   | 3.2  | 7.0  | 9     | 18  | 4.8  | 15   |
| 5     | 10  | 3.2  | 10.5 | 10    | 20  | 4.8  | 17.5 |

GR: Gradient Ratio
